# Supplementary material for: Presence of anti-Müllerian hormone (AMH) during follicular development in the porcine ovary
Source: PubMed Central journal article supplement (PMC6067700; doi:10.1371/journal.pone.0197894), 2018-07-31
Supplement: pone.0197894.s002.pdf [file pone.0197894.s002.pdf]

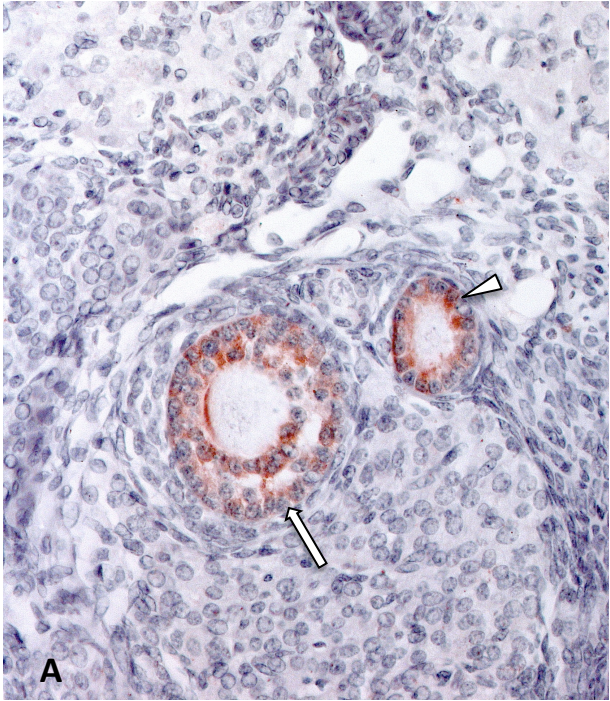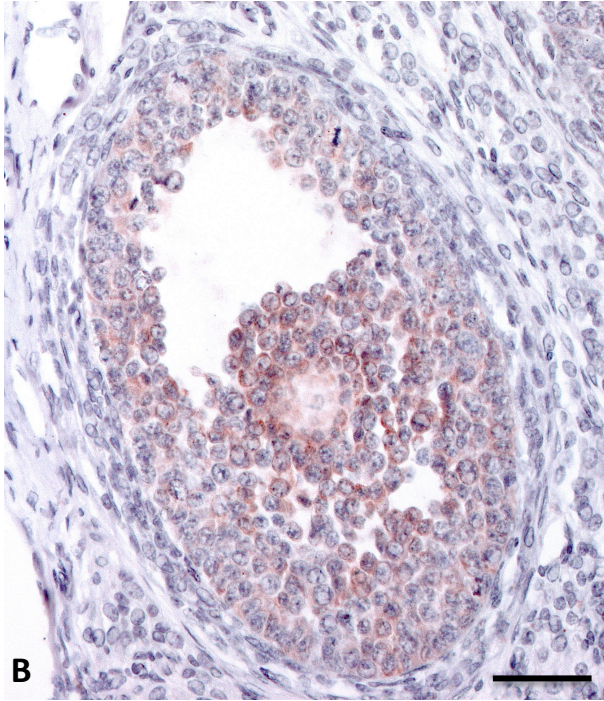

Supplemental figure 2
